# Supplementary material
Source: HighWire-hosted journal article supplement (https://jnm.snmjournals.org/highwire/filestream/95193/field_highwire_adjunct_files/0/187492_Supplemental_Data.pdf)

# Glucose Metabolic Profile by Visual Assessment Combined with SPM Analysis in Pediatric Patients with Epilepsy

## RESULTS

According to interval between  $^{18}\text{F}$ -FDG PET study and the time since last seizure, we divided the patients into 3 subgroups: (1) 1d – 1m, (2) 1m – 1y, (3) more than 1y. We found that patients with a prolonged period of seizure had more subtle metabolic abnormalities on  $^{18}\text{F}$ -FDG PET images (**Fig. 1A and B**).

**Supplemental Figure 1.** Hypo- or hyper-metabolic changes on  $^{18}\text{F}$ -FDG PET images in pediatric epilepsy patients who had different period since last seizure. **(A)** In patients with hypo-metabolism, significantly lower value of  $|A|$  was found in patients with more than 1 year of time since last seizure, compared to those with a much shorter period since the last seizure. **(B)** In patients with hyper-metabolism, significantly lower value of  $|A|$  was found in patients with more than 1 year of time since last seizure, compared to those with a much shorter period since the last seizure.

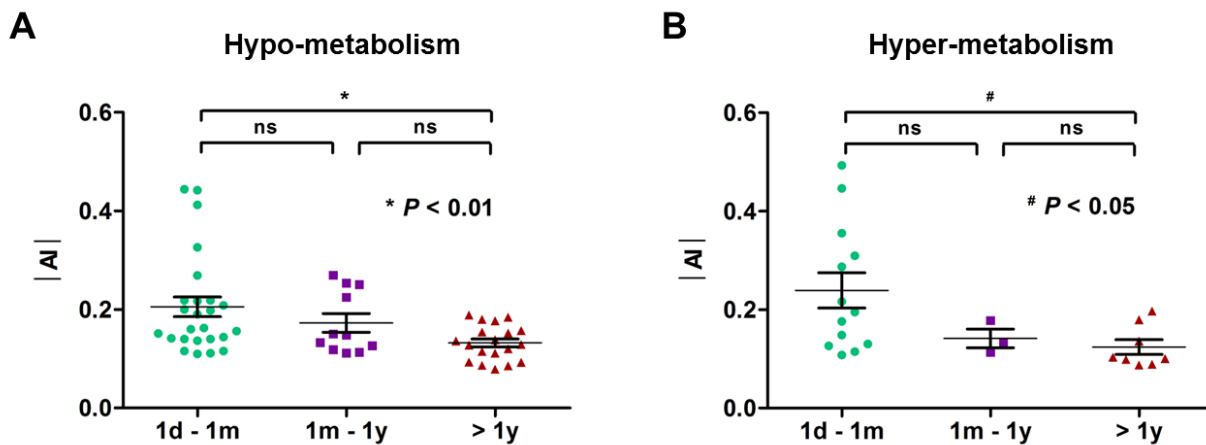

Supplement: 187492_Supplemental_Data.pdf [file 187492_Supplemental_Data.pdf]
